# Supplementary material
Source: PubMed Central journal article supplement (PMC5853921)

**A**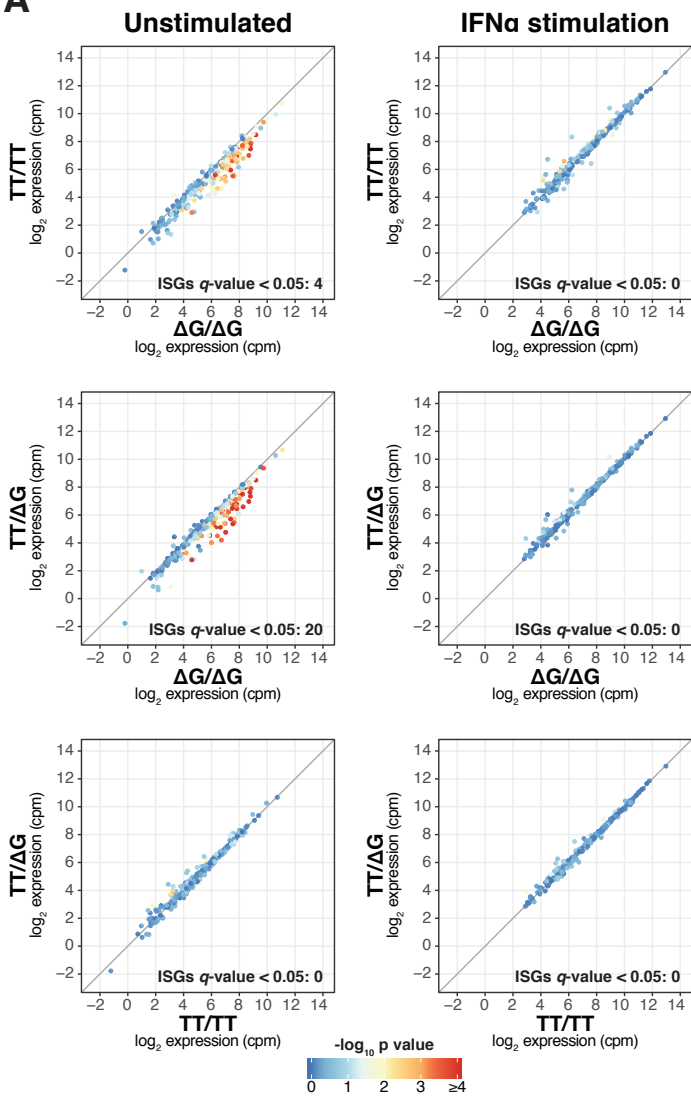**B**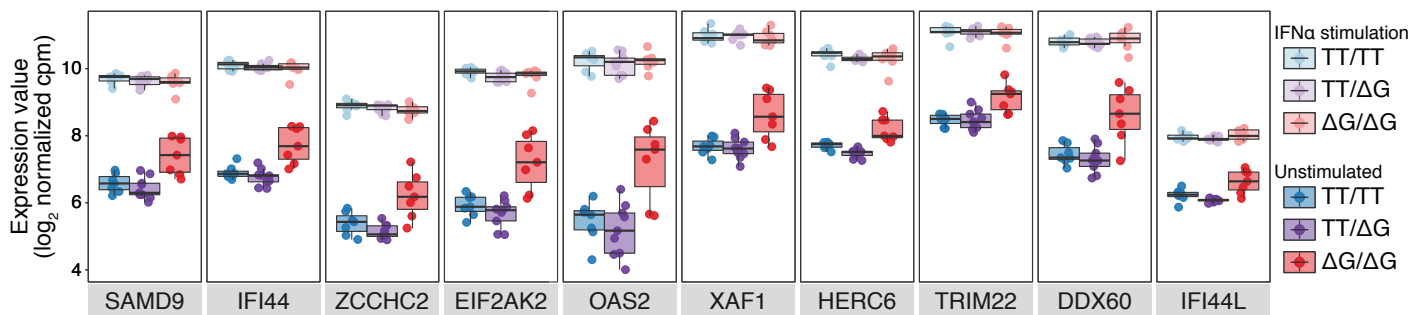**C**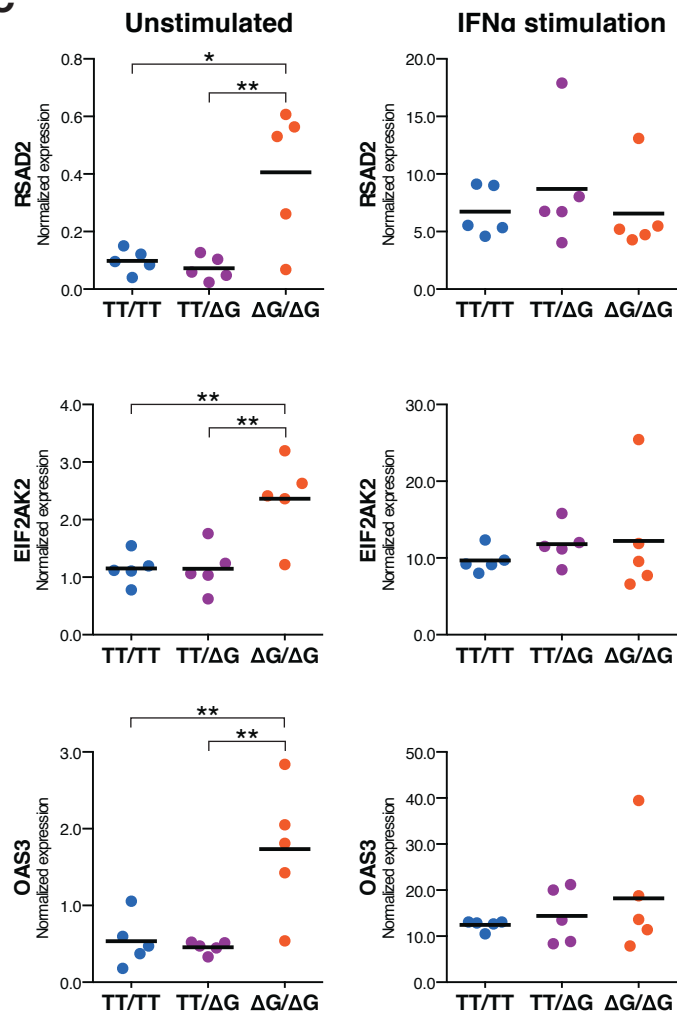

Supplement: jix593_suppl_supplemental_figure1.pdf [file jix593_suppl_supplemental_figure1.pdf]

**A**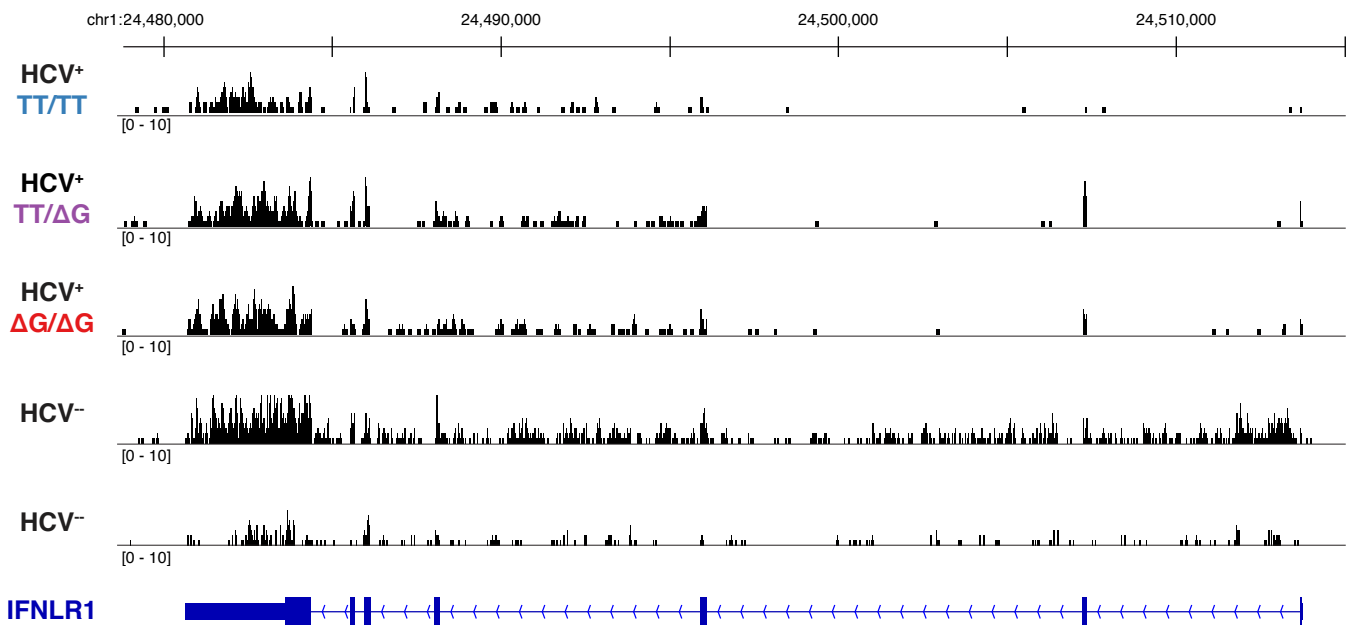**B**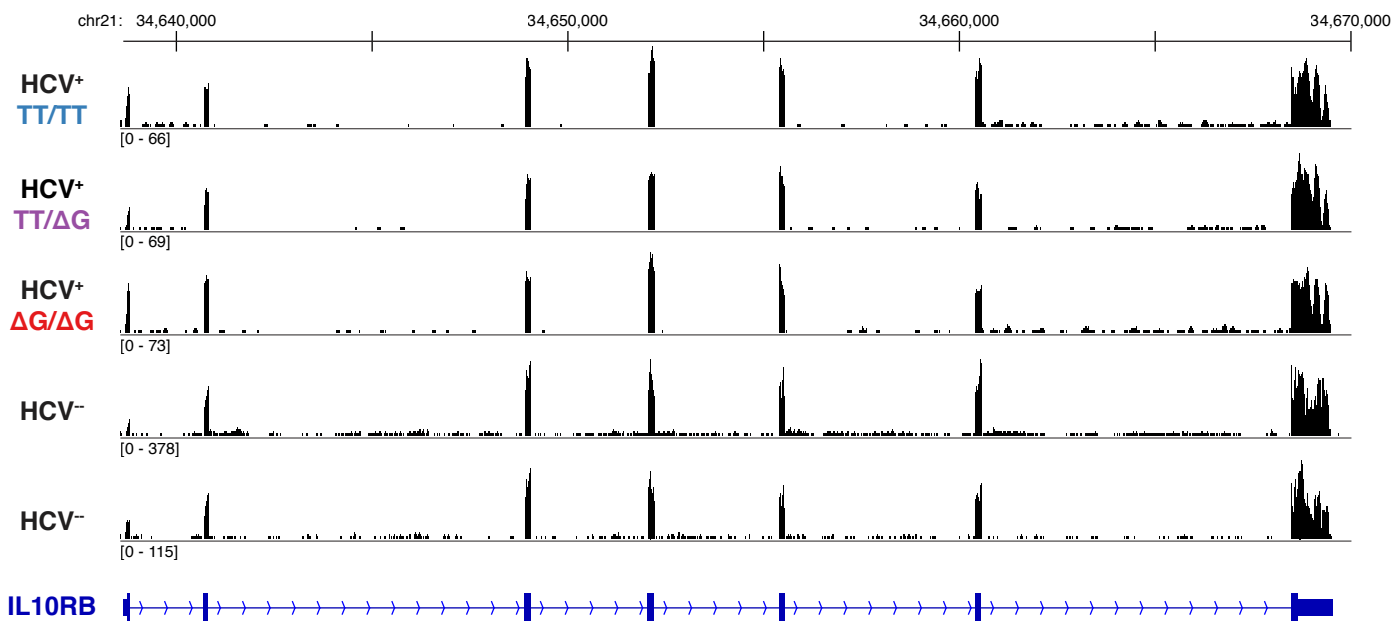

Supplement: jix593_suppl_supplemental_figure2.pdf [file jix593_suppl_supplemental_figure2.pdf]
